# Supplementary material
Source: MDPI journal article supplement (https://www.mdpi.com/2227-9040/11/1/65)
Supplement: s1 [file s1]

Article

# Synthesis of Graphene-Oxide-Decorated Porous ZnO Nanosheet Composites and Their Gas Sensing Properties

Jie Li <sup>1,2</sup>, Zhen Jin <sup>1,2,\*</sup>, Yang Chao <sup>2</sup>, Aijing Wang <sup>2</sup>, Decai Wang <sup>2</sup>, Shaohua Chen <sup>1,2</sup> and Quan Qian <sup>2</sup>

<sup>1</sup> Anhui Advanced Building Materials Engineering Laboratory, Anhui JianZhu University, Hefei 230601, China

<sup>2</sup> School of Materials and Chemical Engineering, Anhui JianZhu University, Hefei 230601, China

\* Correspondence: ftbjin@hotmail.com

The statistical distributions of the length and width of the GO/ZnO nanosheet composites are present in Figure S1. As shown, the average length and width of the GO/ZnO nanosheet composites are 5.0  $\mu\text{m}$  and 3.5  $\mu\text{m}$ , respectively. And, the thickness of the single modified nanosheet is about 15 nm. The particle size of the GO/ZnO nanosheet composites was also examined by Malvern Zetasizer Nano, the result indicate that the average particle size is 5.92  $\mu\text{m}$ , which is consistent with our statistical results.

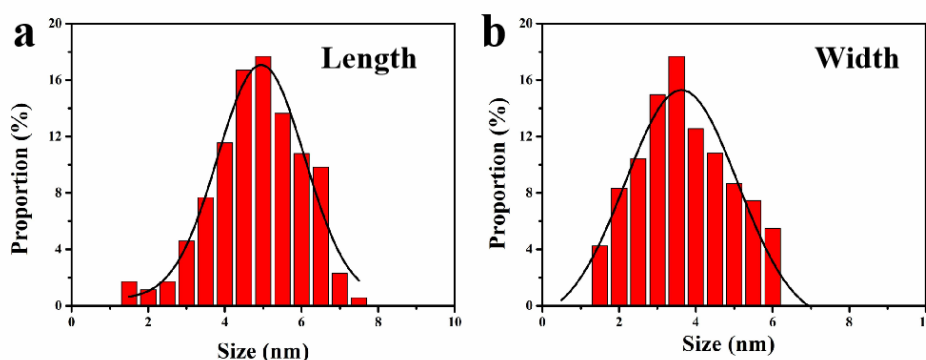

**Figure S1.** the statistical distributions of the length and width of the GO/ZnO nanosheet composites.

The electrical behavior of GO/ZnO nanosheet composites was investigated, and the corresponding current-voltage (I-V) curves were displayed in Figure S2. It can be seen that the ZnO/GO samples exhibit the typical p-type semiconductor and almost linear characteristics, indicating the ohmic nature of films.

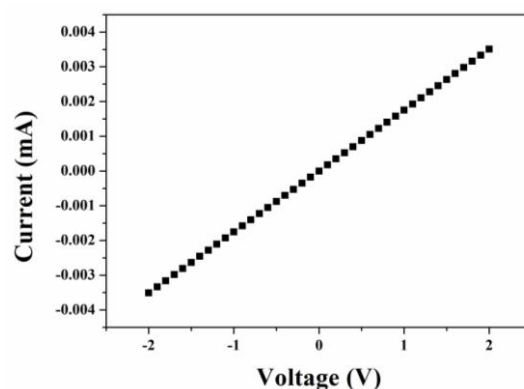

**Figure S2.** the corresponding current-voltage (I-V) curves of the GO/ZnO nanosheet composites.
